# Supplementary material for: Characterization of an Eukaryotic PL-7 Alginate Lyase in the Marine Red Alga Pyropia yezoensis
Source: PubMed Central journal article supplement — Curr Biotechnol. 2015 Aug;4(3):240–8. doi: 10.2174/2211550104666150915210434 (PMC5436490; doi:10.2174/2211550104666150915210434), 2015-08
Supplement: CBIOT-4-240_SD1.pdf [file CBIOT-4-240_SD1.pdf]

## SUPPLEMENTARY MATERIAL

Characterization of an Eukaryotic PL-7 Alginate Lyase in the Marine Red Alga *Pyropia yezoensis*

Akira Inoue, Chieco Mashino, Toshiki Uji, Naotsune Saga, Koji Mikami and Takao Ojima

Graduate School of Fisheries Sciences, Hokkaido University, 3-1-1 Minato-cho Hakodate, Hokkaido 041-8611, Japan

| PA-F1                                                         |       |            |
|---------------------------------------------------------------|-------|------------|
| GGGCTCGGCCCTTCGTTTCGGCATAGGAGCACACACGCAGCCCCGCCTTCCCACCAGTGC  |       | 60         |
| AACATGATGCGCTTTGCCATAGCCGCCGCGCTGGGTGCTTTGCTGGCCGTTGCGGCCGCC  |       | 120        |
| <b>M M R F A I A A A L G A L L A V A A A</b>                  |       | <b>19</b>  |
| -----                                                         |       |            |
| CCCGCCGCGGTGGCCGCCGCCGCGAGGCCGCCATGGGACATTGCTCGCTTCCGCCCCGCT  |       | 180        |
| <b>P A A V A A A R R P P W D I A R F R P A</b>                |       | <b>39</b>  |
| -----                                                         |       |            |
| CTAAGAGTTGCCAAGCTCCAGGCGCCCGACAGCGTCCAACGCAAAGATGTGCGATCCTTC  |       | 240        |
| <b>L R V A K L Q A P D S V Q R K D V R S F</b>                |       | <b>59</b>  |
| -----                                                         |       |            |
| CCAAACTTTCAAGCCGACCACTTTTACTCTGAGAACCGGGACATGGTGTGTTGTCATGGGT |       | 300        |
| <b>P N F Q A D H F Y S E N R D M V F V M G</b>                |       | <b>79</b>  |
| -----                                                         |       |            |
| GGCGACTCACAACGGTCCGAGCTCCGCTTCCTCGACGAGTGGAGCGTCCGCACATCCAGT  |       | 360        |
| <b>G D S Q R S E L R F L D E W S V R T S S</b>                |       | <b>99</b>  |
| -----                                                         |       |            |
| ACCCGCCGGATGGTGGGGGTGCTGACCCTCCCCACGCCGTTGCGGGGGATGAAACACTTC  |       | 420        |
| <b>T R R M V G V L T L P T P L R G M K H F</b>                |       | <b>119</b> |
| -----                                                         |       |            |
| ACGTGGATGCAGGTGCACGGGGCAGCAAGGGGAAAAAACCGCTGCTGCGCCTGTCGTGG   |       | 480        |
| <b>T W M Q V H G G S K G K K P L L R L S W</b>                |       | <b>139</b> |
| -----                                                         |       |            |
| CATGACAAGCGTGAGCAGGGTGGGAAGGACCTGCGGAATACGATGCTCGCAACGGTGCGG  |       | 540        |
| <b>H D K R E Q G G K D L R N T M L A T V R</b>                |       | <b>159</b> |
| -----                                                         |       |            |
| CTCAACAACAAGTCAGGCGACGCCGGGCGGTTCAAGAAGATCGTGTTGGGAACCCGCCCC  |       | 600        |
| <b>L N N K S G D A G R F K K I V L G T R P</b>                |       | <b>179</b> |
| -----                                                         |       |            |
| TCTGGCCGCTTTGTTGCCGACGTACGGGTAGAGCGGTCACGGCTGACCGTCCGCCTCAAC  |       | 660        |
| <b>S G R F V A D V R V E R S R L T V R L N</b>                |       | <b>199</b> |
| -----                                                         |       |            |
| GGGCGAAACTGGTAGATGAAGACGTGGGGTACTGGACTTACTCGACCAATTACTTCAAG   |       | 720        |
| <b>G R K L V D E D V G Y W T Y S T N Y F K</b>                |       | <b>219</b> |
| -----                                                         |       |            |
| GCGGGGTCTACGTCCAGGAGGGCAGCCCCGATGCGAGGGTAGTGTTTCATGGTCTGACT   |       | 780        |
| <b>A G V Y V Q E G S P D A R V V F H G L T</b>                |       | <b>239</b> |
| -----                                                         |       |            |
| GTGTCGTAGCTGACTATGTCCTATTTGCAGGGTGATTGCGCAGAGAGGCAAGCGCGAGGG  |       | 840        |
| <b>V S *</b>                                                  |       | <b>241</b> |
| -----                                                         |       |            |
| AAAGAGGGGATGATGGTGTCCGACAAGGGCAAGCCC                          | PA-R2 | 876        |
| -----                                                         |       |            |
| PA-R1                                                         |       |            |

Fig. (S1). Nucleotide and the deduced amino-acid sequences of PyAly cDNA. The nucleotide and the deduced amino acid sequences are represented in plain and bold letters, respectively. Dashed line shows the predicted signal peptide sequence. Arrows indicate the annealing positions of primers used in PCR.

**PA-F1**

GGGCTCGGCCCTTCGTTTCGGCATAGGAGCACACACGCAGCCCGCCTCCCACCAGTGC 60  
AACATGATGCGCTTTGCCATAGCCGCCGCGCTGGGTGCTTTGCTGGCCGTTGCGGCCGCC 120  
**M M R F A I A A A L G A L L A V A A A 19**  
CCCCGCCGGTGGCCGCCGCCGAGCCGCCATGGGACATTGCTCGCTTCCGCCCGCT 180  
**P A A V A A A R R P P W D I A R F R P A 39**  
CTAAGAGTTGCCAAGCTCCAGgtgcgccgggggaggtgactgacgaggttgagaagg 240  
**L R V A K L Q 46**  
gatgctccaacagaggaggccgtgcccgggggtttggctcttgcgcccaggct 300  
gttggaacaccagttgccccaccagcgtgaacaccgcgctcgaggagaagaaggaccgc 360  
tgacacccgattgctggtggtggtgcatccttgttatcctgttctggtcgctgtgactcc 420  
cctatgttcctctcttgcgccctccccctccgccctccgccagGCGCCCGACAGCGT 480  
**A P D S V 51**  
CCAACGCAAAGATGTGCGATCCTTCCCAAACCTTCAAGCCGACCACTTTACTCTGAGAA 540  
**Q R K D V R S F P N F Q A D H F Y S E N 71**  
CCGGGACATGGTGTGTCATGGGTGGCGACTCACAACGGTCCGAGCTCCGCTTCCTCGA 600  
**R D M V F V M G G D S Q R S E L R F L D 91**  
CGAGTGGAGCGTCCGCACATCCAGTACCCGCCGGATGGTGGGGGTGCTGACCCTCCCAC 660  
**E W S V R T S S T R R M V G V L T L P T 111**  
GCCGTTGCGGGGGATGAAACACTTCACGTGGATGCAGGTGCACGGGGGAGCAAGGGGAA 720  
**P L R G M K H F T W M Q V H G G S K G K 131**  
AAAACCGCTGCTGCGCCTGTCGTGGCATGACAAGCGTGAGCAGGGTGGGAAGGACCTGCG 780  
**K P L L R L S W H D K R E Q G G K D L R 151**  
GAATACGATGCTCGCAACGGTGGCGCTCAACAACAAGTCAGgtacgctgaggagatggg 840  
**N T M L A T V R L N N K S 164**  
ggggggaggggagtggggaagggggcgaggagagtgcgccgggggcttgcgggcctccaa 900  
gcgtctgtcagagtttgaggagcagacctcgatgacgacggcgccccgacgggtccc 960  
catcagcctggtgcggcgcgactgatcaccaaggcgacgcgtcctttcccatcttttac 1020  
gtcttggcgtatgttttctgtctttccctcccgttgtcgttattggtacgcggtgcg 1080  
ccccgcagGCGACGCCGGCGGTTCAAGAAGATCGTGTGGGAACCCGCCCTCTGGCC 1140  
**G D A G R F K K I V L G T R P S G 181**  
GCTTTGTTGCCGACGTACGGGTAGAGCGGTACGGCTGACCGTCCGCCTCAACGGGCGCA 1200  
**R F V A D V R V E R S R L T V R L N G R 201**  
AACTGGTAGATGAAGACGTGGGGTACTGGACTTACTCGACCAATTACTCAAGGCGGGGG 1260  
**K L V D E D V G Y W T Y S T N Y F K A G 221**  
gtatgttcggttgcgagcctcctcgatgtcacggcgctgtcgactgcctgcctgtg 1320  
tgttccttcggggggaagccgtctctttgcctcccctcgcccctggcagaggatgcg 1380  
cctggggcgccaccgaccggtcgcgccagacgacctcgccagcgagtggttgccag 1440  
gcacttactgcccgtcccgtgcgctttgacaatcgtcattctttccctctttcctcgtc 1500  
gcttccccgctggccattgacgcaettgctgggcgacgctgctccccacccccgctcccc 1560  
cccgccccccacacggcagTCTACGTCCAGGAGGGCAGCCCCGATGCGAGGGTAGTGTTT 1620  
**V Y V Q E G S P D A R V V F 235**  
CATGGTCTGACTGTGTCGTAGCTGACTATGTCTATTTGCAGGGTGATTGCGCAGAGAGG 1680  
**H G L T V S \* 241**  
CAAGCGCGAGGAAAGAGGG 1700

**PA-R2**

**Fig. (S2). Genomic DNA sequence of PyAly.** Nucleotide and deduced amino acid sequences are each represented in plain and bold letters. Exon and intron regions are written in capital and small letters, respectively. Arrows indicate the annealing positions of primers used in PCR.
